# Supplementary material
Source: PubMed Central journal article supplement (PMC3704029)
Supplement: 1222251110_pnas.201222251SI.pdf [file 1222251110_pnas.201222251SI.pdf]

# Supporting Information

Loi et al. 10.1073/pnas.122251110

## SI Materials and Methods

**Gene-Expression Data and Survival Analyses.** We retrieved all clinical and gene expression data of previously reported microarray datasets (Table S1). To ensure comparability of expression values across multiple data sets, *ESR1*, *ERBB2*, and *AURKA* gene expression values were rescaled before applying the subtype classifier as in ref. 1 (we used SCMOD1 classifier, which is referred to as SCM, Subtype Classification Model, in the present study). Our rescaling approach is implemented and fully documented in our R/Bioconductor package *genefu* v1.5.2 [see function ‘rescale’ (1)]. The TNBC identified using the SCM classifier is highly concordant with the “basal-like” subtype using the PAM50 classifier (2) and shows low *ESR1*, *PgR*, and *ERBB2* expression (Fig. S1). Differences in expression of CD73 according to subtype was examined using the Kruskal–Wallis test. Distant metastasis-free survival was the primary survival end-point, which is defined as the time elapsing between breast cancer diagnosis and date of local or systemic relapse, or death. When distant metastasis-free survival data were not reported, relapse-free survival information was used if available. For visualization, survival plots according to the CD73 tertiles were drawn using the Kaplan–Meier method, and the significance of the survival differences were evaluated using the log-rank *P*-test. In 137 cases, identification of subtype was not possible because of the absence of *AURKA*, *ESR1*, or *ERBB2* gene-expression information. These cases were included in “all patients” analyses. To assess correlation with clinical outcomes with just an anthracycline chemotherapy alone, we analyzed a cohort of breast cancer patients treated with preoperative epirubicin (a commonly used anthracycline) chemotherapy for four cycles before surgery in the setting of a clinical trial previously described (3). The clinical endpoint used was pathologic complete response (pCR) rates documented at surgery, or complete disappearance of invasive disease, which is an accepted surrogate for disease-free and overall survival in ER<sup>+</sup>/HER2<sup>−</sup> breast cancer (4). CD73 levels were correlated with pCR as a continuous variable (i.e., to determine whether higher expression correlated with a higher chance of obtained pCR), using a receiver operating characteristic (ROC) curve, with the predictive ability assessed by calculating the area under the curve (AUC) together with 95% CI using the concordance index. Patients were negative for expression of the ER using immunohistochemistry and negative for *ERBB2* amplification detected by FISH.

**CD73/CD39 Up-Regulation Assays.** T47D, BT474, SKBR3 and MDA-MB-231 cells were cultured in DMEM (Wisent) 10% (vol/vol) FBS (Invitrogen). ZR75 cells were cultured in RPMI (Wisent) 10% FBS and MDA-MB-468 were cultured in DMEM/F12 (Invitrogen) 10% FBS. Human breast cancer lines were a generous gift from Sylvie Mader (Institute for Research in Immunology in

Cancer, Montreal, Canada). LOX-1MV1 and A2058 cells (a generous gift from Karen Sheppard, Peter MacCallum Cancer Centre, East Melbourne, VIC, Australia) were cultured in RPMI 10% (vol/vol) FCS with Hepes, glutamax, and pen-strep. RPMI-8226 cells (a generous gift from Ricky Johnstone, Peter MacCallum Cancer Centre, East Melbourne, VIC, Australia) were cultured in RPMI 10% FCS with glutamax, and pen-strep. Kasumi-1 cells (a gift from Ricky Johnstone, Peter MacCallum Cancer Centre, East Melbourne, VIC, Australia) were cultured in RPMI 20% FCS with glutamax, nonessential amino acids, sodium pyruvate, Hepes, and pen-strep. For in vitro assays, cells were seeded for 24 h, then treated with chemotherapeutic drugs diluted in their respective culture media. After 48 h of treatment, cells were collected and stained for flow cytometry with PE-conjugated anti-human CD73 mAb (clone AD2; BD Bioscience) and APC-conjugated anti-human CD39 mAb (clone TU66; BD Bioscience), except for doxorubicin (DOX)-treated cells, which were stained with APC-conjugated anti-human CD73 (clone AD2) for breast cancer cells or purified anti-human CD73 mAb (clone 1D7, Abcam) followed by FITC-conjugated secondary antibody for melanoma and leukemia cells. Data were acquired using an LSR Fortessa (BD Biosciences) and analyzed using FlowJo software.

**CD73 Expression in Vivo.** Female nonobese diabetic (NOD)-SCID mice (JAX mice, The Jackson Laboratory) were injected subcutaneously with 10<sup>6</sup> MDA-MB-231 cells and treated at day 20 with an intratumoral injection of DOX (1 mM in 50  $\mu$ L PBS) or PBS (three mice per group). Tumors were removed 48 h later for CD73 expression analysis. For IHC, tumors were embedded in OCT and snap-frozen. Sections were cut at 5  $\mu$ m with a cryostat microtome, fixed in 100% (vol/vol) precooled (−20 °C) acetone, incubated with 1.5% (vol/vol) H<sub>2</sub>O<sub>2</sub>, and blocked for 30 min with protein block solution (Dako), incubated with anti-human CD73 mAb (clone 1D7; Abcam) for 1 h followed by biotin-conjugated secondary antibody and streptavidin-conjugated HRP (Dako). For immunoblotting, tumor lysates (20  $\mu$ g of protein) were subjected to SDS/PAGE, and transferred onto nitrocellulose membranes (0.45  $\mu$ m) (Bio-Rad), blocked 1 h in 5% (wt/vol) milk and incubated with anti-human CD73 mAb (1:1,000) clone 1D7 (Abcam) and anti-Actin (1:25,000) at 4 °C overnight. Detection was carried out using anti-mouse HRP-conjugated secondary antibody and chemiluminescence-based detection systems according to the manufacturer’s recommendations (Thermo Scientific). For LI-COR imaging, membranes were incubated with anti-CD73 (1:2,000) and anti-GAPDH (1:5,000) at 4 °C overnight and proteins detected with fluorescence-conjugated anti-mouse or anti-rabbit antibodies (IRDye 800CW or IRDye 680RD; Li-COR) using Odyssey (Li-COR). Quantification of bands was done using Image studio 2.0 software (Li-COR).

1. Haihe-Kains B, et al. (2012) A three-gene model to robustly identify breast cancer molecular subtypes. *J Natl Cancer Inst* 104(4):311–325.
2. Parker JS, et al. (2009) Supervised risk predictor of breast cancer based on intrinsic subtypes. *J Clin Oncol* 27(8):1160–1167.

3. Desmedt C, et al. (2011) Multifactorial approach to predicting resistance to anthracyclines. *J Clin Oncol* 29(12):1578–1586.
4. Liedtke C, et al. (2008) Response to neoadjuvant therapy and long-term survival in patients with triple-negative breast cancer. *J Clin Oncol* 26(8):1275–1281.

**Table S1. Compendium of microarray datasets of unique breast cancer patients**

| Dataset    | Microarray technology | Survival data | Treatment                  | No. of patients        | No. of probes | Source               | Reference |
|------------|-----------------------|---------------|----------------------------|------------------------|---------------|----------------------|-----------|
| EXPO       | Affymetrix HGU        | NA            | NA                         | 353                    | 54,675        | GEO: GSE2109         | 1         |
| VDX*       | Affymetrix HGU        | RFS, DMFS     | Untreated                  | 344                    | 22,283        | GEO: GSE2034/GSE5327 | 2, 3      |
| NKI*       | Agilent               | RFS, DMFS, OS | Untreated, chemo           | 337                    | 24,481        | Rosetta Inpharmatics | 4, 5      |
| UCSF*      | In-house cDNA         | DNFS, RFS, OS | Untreated, chemo, hormonal | 170                    | 10,368        | Authors' Web site    | 6, 7      |
| STNO2*     | In-house cDNA         | RFS, OS       | Untreated, chemo, hormonal | 122                    | 7,787         | SMD                  | 8         |
| NCI*       | In-house cDNA         | RFS           | Untreated, chemo, hormonal | 99                     | 6,878         | Authors' Web site    | 9         |
| MSK        | Affymetrix HGU        | DMFS          | Heterogeneous              | 99                     | 22,283        | GEO: GSE2603         | 10        |
| UPP*       | Affymetrix HGU        | RFS           | Untreated, hormonal        | 251 (190) <sup>†</sup> | 44,928        | GEO: GSE3494         | 11        |
| STK        | Affymetrix HGU        | RFS           | Untreated, chemo, hormonal | 159                    | 44,928        | GEO: GSE1456         | 12        |
| UNT*       | Affymetrix HGU        | RFS, DMFS     | Untreated                  | 137 (94) <sup>†</sup>  | 44,928        | GEO: GSE2990         | 13, 14    |
| UNC4*      | Agilent               | RFS, OS       | Heterogeneous              | 337                    | 17,779        | UNC DB               | 15        |
| NCH        | Agilent               | DMFS, RFS, OS | Heterogeneous              | 135                    | 17,086        | AE: E-UCON-1         | 16        |
| IGR2       | Affymetrix            | NA            | Chemo                      | 49                     | 22,283        | Journal Web site     | 17        |
| CAL*       | Affymetrix HGU        | RFS, DMFS, OS | Chemo, hormonal            | 118                    | 22,283        | AE: E-TABM-158       | 18        |
| TRANSBIG*  | Affymetrix HGU        | RFS, DMFS, OS | Untreated                  | 198                    | 22,283        | GEO: GSE7390         | 19        |
| DUKE       | Affymetrix HGU95      | OS            | Heterogeneous              | 171                    | 12,625        | GEO: GSE3143         | 20        |
| DUKE2      | Affymetrix X3P        | NA            | Chemo                      | 160                    | 61,359        | GEO: GSE6961         | 21        |
| MAINZ*     | Affymetrix HGU        | DMFS          | Untreated                  | 200                    | 22,283        | GEO: GSE11121        | 22        |
| LUND2      | Swegene               | NA            | Hormonal                   | 105                    | 27,648        | GEO: GSE5325         | 23        |
| LUND       | Swegene               | NA            | Heterogeneous              | 143                    | 26,824        | GEO: GSE5325         | 24        |
| LUH        | In-house cDNA         | NA            | Heterogeneous              | 58                     | 3,389         | Authors' Web site    | 25        |
| FNCLCC     | In-house cDNA         | NA            | Chemo                      | 150                    | 9,216         | GEO: GSE7017         | 26        |
| MDA        | Affymetrix HGU        | NA            | Chemo                      | 133 (3) <sup>†</sup>   | 22,283        | MDACC DB             | 27        |
| MDA3       | Affymetrix HGU        | NA            | Chemo                      | 45                     | 22,283        | MDACC DB             | NA        |
| MDA4       | Affymetrix HGU        | NA            | Chemo                      | 129 (64) <sup>†</sup>  | 22,283        | MDACC DB             | 28, 29    |
| MDA6       | Affymetrix HGU        | NA            | Chemo                      | 102 (6) <sup>†</sup>   | 22,283        | MDACC DB             | 30        |
| EMC2*      | Affymetrix HGU        | DMFS          | Chemo                      | 204                    | 54,675        | GEO: GSE12276        | 31        |
| MUG        | Operon                | NA            | Chemo                      | 152                    | 35,788        | GEO: GSE10510        | 32        |
| NCCS       | Affymetrix HGU        | NA            | NA                         | 196                    | 22,283        | GEO: GSE5364         | 33        |
| MCCC       | Illumina              | NA            | NA                         | 75                     | 48,701        | GEO: GSE19177        | 34        |
| KOO*       | Affymetrix HGU95      | NA            | NA                         | 88                     | 48,701        | Authors' Web site    | 35        |
| EORTC10994 | Affymetrix HGU        | NA            | Chemo                      | 49                     | 22,283        | GEO: GSE1561         | 36        |
| HLP        | Illumina              | NA            | Chemo                      | 53                     | 48,701        | AE: E-TABM-543       | 37        |
| DFHCC*     | Affymetrix HGU        | DMFS          | Heterogeneous              | 115                    | 54,675        | GEO: GSE19615        | 38        |
| DFHCC2     | Affymetrix HGU        | NA            | Chemo                      | 84                     | 54,675        | GEO: GSE18864        | 39        |
| DFHCC3     | Affymetrix HGU        | NA            | Chemo                      | 40 (33) <sup>†</sup>   | 54,675        | GEO: GSE3744         | 40        |
| DFHCC4*    | Affymetrix HGU        | NA            | Untreated                  | 129 (98) <sup>†</sup>  | 54,675        | GEO: GSE5460         | 41        |
| MAQC2      | Affymetrix HGU        | NA            | Chemo                      | 230                    | 22,283        | GEO: GSE20194        | 42        |
| JBI        | Affymetrix HGU        | NA            | NA                         | 97                     | 54,675        | GEO: GSE20711        | 43        |
| MGH        | Arcturus              | DMFS, RFS     | Hormonal                   | 60                     | 22,575        | GEO: GSE1378         | 44        |
| TAM        | Affymetrix HGU        | DMFS, RFS     | Hormonal                   | 345 (242) <sup>†</sup> | 44,928        | GEO: GSE6532/GSE9195 | 45        |
| MDA5       | Affymetrix HGU        | DMFS          | Hormonal                   | 298                    | 22,283        | GEO: GSE17705        | 46        |
| VDX3       | Affymetrix HGU        | DMFS          | Hormonal                   | 136                    | 22,283        | GEO: GSE12093        | 47        |
| TOP        | Affymetrix HGU        | pCR           | Chemo                      | 120                    | 54,675        | GEO: GSE16446        | 48        |

\*Microarray datasets of unique breast cancer patients (6,209) used in this study were retrieved from journal or authors' Web sites, Gene Expression Omnibus (GEO; [www.ncbi.nlm.nih.gov/geo/](http://www.ncbi.nlm.nih.gov/geo/)), ArrayExpress (AE; <http://www.ebi.ac.uk/arrayexpress/>), Stanford Microarray Database (SMD; <http://smd.stanford.edu/>), MD Anderson Cancer Center Microarray database (MDACC DB; <http://bioinformatics.mdanderson.org/pubdata.html>), University of North Carolina database (UNC DB; <https://genome.unc.edu/>), and Rosetta Inpharmatics ([www.rosettatabio.com/](http://www.rosettatabio.com/)). Each dataset was assigned a short acronym and an instance number if several datasets were published by the same institution or consortium: CAL: dataset of breast cancer patients from the University of California, San Francisco and the California Pacific Medical Center (United States); DFHCC: Dana-Farber Harvard Cancer Center (United States); DUKE: Duke University Hospital (United States); EMC: Erasmus Medical Center (The Netherlands); EORTC10994: Trial number 10994 from the European Organization for Research and Treatment of Cancer Breast Cancer (Europe); EXPO: Expression Project for Oncology, large dataset of microarray data published by the International Genomics Consortium (United States); FNCLCC: Fédération Nationale des Centres de Lutte contre le Cancer (France); HLP: University Hospital La Paz (Spain); JBI: Jules Bordet Institute (Belgium); KOO: Koo Foundation Sun Yat-Sen Cancer Centre (Taiwan); LUH: Lund University Hospital (Germany); LUND: Lund University Hospital (Sweden); MAINZ: Mainz hospital (Germany); MAQC: Microarray Quality Control Consortium (United States); MCCC: Peter MacCallum Cancer Centre (Australia); MDA: MD Anderson Cancer Center (United States); MGH: Massachusetts General Hospital (Boston, MA); MSK: Memorial Sloan-Kettering (United States); MUG: Medical University of Graz (Austria); NCCS: National Cancer Centre of Singapore (Singapore); NCH: Nottingham City Hospital (U.K.); NCI: National Cancer Institute (United States); NKI: National Kanker Instituut (The Netherlands); STK: Stockholm. Karolinska University Hospital (Sweden); STNO: Stanford/Norway (United States and Norway); TAM: tamoxifen-treated dataset collected by Jules Bordet Institute (Belgium); TOP: TOP trial initiated at the Jules Bordet Institute; TRANSBIG: dataset collected by the TransBIG consortium (Europe); UCSF: University of California, San Francisco; UNC: University of North Carolina (United States); UNT: cohort of untreated breast cancer patients from the Oxford Radcliffe (United Kingdom) and Karolinska (Sweden) hospitals; UPP: Uppsala Hospital (Sweden); VDX: Veridex (The Netherlands). These datasets were generated with diverse microarray technologies developed either by Agilent ([www.genomics.agilent.com](http://www.genomics.agilent.com)), Affymetrix (HGU GeneChips, which include chips HG-U133A, HG-U133B, and HG-U133PLUS2, and X3P GeneChip; [www.affymetrix.com](http://www.affymetrix.com)); Arcturus (<http://products.invitrogen.com>); Swegene ([www.genomics.agilent.com](http://www.genomics.agilent.com)), Operon ([www.operon.com](http://www.operon.com)), or developed in-house (cDNA, cDNA, platforms). For most datasets survival data [distant metastasis-free survival (DMFS), relapse-free survival (RFS), and overall survival (OS)], the complete pathological response (pCR) and information regarding the adjuvant treatment (untreated, chemo, hormonal, and heterogeneous, standing for no treatment, chemotherapy, hormonal therapy, and heterogeneous combination of therapies, respectively) was available, otherwise missing information is referred to as not available (NA). All untreated patients had surgery, and most of them had radiation therapy, although information is not available for all datasets.

<sup>†</sup>Duplicated patients were removed from the UNT, UPP, MDA4, DFHCC2, DFHCC3, and TAM datasets for the estimation of concordance and prognostic value.

1. Bittner M (2005) Expression Project for Oncology (expO). Available at [www.intgen.org/expo](http://www.intgen.org/expo). Accessed November 3, 2010.
2. Minn AJ, et al. (2007) Lung metastasis genes couple breast tumor size and metastatic spread. *Proc Natl Acad Sci USA* 104(16):6740–6745.
3. Wang Y, et al. (2005) Gene-expression profiles to predict distant metastasis of lymph-node-negative primary breast cancer. *Lancet* 365(9460):671–679.
4. van de Vijver MJ, et al. (2002) A gene-expression signature as a predictor of survival in breast cancer. *N Engl J Med* 347(25):1999–2009.
5. Van 't Veer LJ, et al. (2002) Gene expression profiling predicts clinical outcome of breast cancer. *Nature* 415(6871):530–536.
6. Korkola JE, et al. (2007) Identification of a robust gene signature that predicts breast cancer outcome in independent data sets. *BMC Cancer* 7:61.
7. Korkola JE, et al. (2003) Differentiation of lobular versus ductal breast carcinomas by expression microarray analysis. *Cancer Res* 63(21):7167–7175.
8. Sorlie T, et al. (2003) Repeated observation of breast tumor subtypes in independent gene expression data sets. *Proc Natl Acad Sci USA* 100(14):8418–8423.
9. Sotiriou C, et al. (2003) Breast cancer classification and prognosis based on gene expression profiles from a population-based study. *Proc Natl Acad Sci USA* 100(18):10393–10398.
10. Minn AJ, et al. (2005) Genes that mediate breast cancer metastasis to lung. *Nature* 436(7050):518–524.
11. Miller LD, et al. (2005) An expression signature for p53 status in human breast cancer predicts mutation status, transcriptional effects, and patient survival. *Proc Natl Acad Sci USA* 102(38):13550–13555.
12. Pawitan Y, et al. (2005) Gene expression profiling spares early breast cancer patients from adjuvant therapy: Derived and validated in two population-based cohorts. *Breast Cancer Res* 7(6):R953–R964.
13. Loi SM, et al. (2007) Definition of clinically distinct molecular subtypes in estrogen receptor-positive breast carcinomas through genomic grade. *J Clin Oncol* 25(10):1239–1246; and erratum (2007) 25(24):3790.
14. Sotiriou C, et al. (2006) Gene expression profiling in breast cancer: Understanding the molecular basis of histologic grade to improve prognosis. *J Natl Cancer Inst* 98(4):262–272.
15. Prat A, et al. (2010) Phenotypic and molecular characterization of the claudin-low intrinsic subtype of breast cancer. *Breast Cancer Res* 12(5):R68.
16. Naderi A, et al. (2007) A gene-expression signature to predict survival in breast cancer across independent data sets. *Oncogene* 26(10):1507–1516.
17. Natowicz R, et al. (2008) Prediction of the outcome of preoperative chemotherapy in breast cancer using DNA probes that provide information on both complete and incomplete responses. *BMC Bioinformatics* 9:149.
18. Chin K, et al. (2006) Genomic and transcriptional aberrations linked to breast cancer pathophysiologies. *Cancer Cell* 10(6):529–541.
19. Desmedt C, et al. (2007) Strong time dependence of the 76-gene prognostic signature for node-negative breast cancer patients in the TRANSBIG multicenter independent validation series. *Clin Cancer Res* 13(11):3207–3214.
20. Bild AH, et al. (2006) Oncogenic pathway signatures in human cancers as a guide to targeted therapies. *Nature* 439(7074):353–357.
21. Bonnefoi H, et al. (2007) Validation of gene signatures that predict the response of breast cancer to neoadjuvant chemotherapy: A substudy of the EORTC 10994/BIG 00-01 clinical trial. *Lancet Oncol* 8(12):1071–1078.
22. Schmidt M, et al. (2008) The humoral immune system has a key prognostic impact in node-negative breast cancer. *Cancer Res* 68(13):5405–5413.
23. Saal LH, et al. (2007) Poor prognosis in carcinoma is associated with a gene expression signature of aberrant PTEN tumor suppressor pathway activity. *Proc Natl Acad Sci USA* 104(18):7564–7569.
24. Niméus-Malmström E, et al. (2008) Gene expression profiling in primary breast cancer distinguishes patients developing local recurrence after breast-conservation surgery, with or without postoperative radiotherapy. *Breast Cancer Res* 10(2):R34.
25. Grubberger S, et al. (2001) Estrogen receptor status in breast cancer is associated with remarkably distinct gene expression patterns. *Cancer Res* 61(16):5979–5984.
26. Campone M, et al. (2008) Prediction of metastatic relapse in node-positive breast cancer: Establishment of a clinicogenomic model after FEC100 adjuvant regimen. *Breast Cancer Res Treat* 109(3):491–501.
27. Hess KR, et al. (2006) Pharmacogenomic predictor of sensitivity to preoperative chemotherapy with paclitaxel and fluorouracil, doxorubicin, and cyclophosphamide in breast cancer. *J Clin Oncol* 24(26):4236–4244.
28. Hess KR, et al. (2006) Pharmacogenomic predictor of sensitivity to preoperative chemotherapy with paclitaxel and fluorouracil, doxorubicin, and cyclophosphamide in breast cancer. *J Clin Oncol* 24(26):4236–4244.
29. Liedtke C, et al. (2008) Response to neoadjuvant therapy and long-term survival in patients with triple-negative breast cancer. *J Clin Oncol* 26(8):1275–1281.
30. Andre F, et al. (2009) Molecular characterization of breast cancer with high-resolution oligonucleotide comparative genomic hybridization array. *Clin Cancer Res* 15(2):441–451.
31. Bos PD, et al. (2009) Genes that mediate breast cancer metastasis to the brain. *Nature* 459(7249):1005–1009.
32. Calabrò A, et al. (2009) Effects of infiltrating lymphocytes and estrogen receptor on gene expression and prognosis in breast cancer. *Breast Cancer Res Treat* 116(1):69–77.
33. Yu K, et al. (2008) A precisely regulated gene expression cassette potentially modulates metastasis and survival in multiple solid cancers. *PLoS Genet* 4(7):e1000129.
34. Waddell N, et al. (2010) Subtypes of familial breast tumours revealed by expression and copy number profiling. *Breast Cancer Res Treat* 123(3):661–677.
35. Huang E, et al. (2003) Gene expression predictors of breast cancer outcomes. *Lancet* 361(9369):1590–1596.
36. Farmer P, et al. (2005) Identification of molecular apocrine breast tumours by microarray analysis. *Oncogene* 24(29):4660–4671.
37. Natrajan R, et al. (2010) An integrative genomic and transcriptomic analysis reveals molecular pathways and networks regulated by copy number aberrations in basal-like, HER2 and luminal cancers. *Breast Cancer Res Treat* 121(3):575–589.
38. Li Q, et al. (2010) Minimising immunohistochemical false negative ER classification using a complementary 23 gene expression signature of ER status. *PLoS ONE* 5(12):e15031.
39. Silver DP, et al. (2010) Efficacy of neoadjuvant Cisplatin in triple-negative breast cancer. *J Clin Oncol* 28(7):1145–1153.
40. Richardson AL, et al. (2006) X chromosomal abnormalities in basal-like human breast cancer. *Cancer Cell* 9(2):121–132.
41. Lu X, et al. (2008) Predicting features of breast cancer with gene expression patterns. *Breast Cancer Res Treat* 108(2):191–201.
42. Popovici V, et al. (2010) Effect of training-sample size and classification difficulty on the accuracy of genomic predictors. *Breast Cancer Res* 12(1):R5.
43. Dedeurwaerder S, et al. (2011) DNA methylation profiling reveals a predominant immune component in breast cancers. *EMBO Mol Med* 3(12):726–741.
44. Ma XJ, et al. (2004) A two-gene expression ratio predicts clinical outcome in breast cancer patients treated with tamoxifen. *Cancer Cell* 5(6):607–616.
45. Sotiriou C, et al. (2005) Breast tumours with intermediate histological grade can be reclassified into prognostically distinct groups by gene expression profiling. *Breast Cancer Res Treat* 94(Suppl 1):S30.
46. Symmans WF, et al. (2010) Genomic index of sensitivity to endocrine therapy for breast cancer. *J Clin Oncology* 28(27):4111–4119.
47. Zhang Y, et al. (2008) The 76-gene signature defines high-risk patients that benefit from adjuvant tamoxifen therapy. *Breast Cancer Res Treat* 116(2):303–309.
48. Desmedt C, et al. (2011) Multifactorial approach to predicting resistance to anthracyclines. *J Clin Oncol* 29(12):1586.

**Fig. S1.** Triple-negative breast cancer (TNBC) as defined by the subtype classifier model (SCM) has similar levels of estrogen receptor (ESR1), progesterone receptor (PgR), and ERBB2 as the prediction analysis of microarray 50-gene classifier (PAM50)-defined “basal-like” subtype. ESR1, PgR, and ERBB2 expression values were rescaled within each dataset (see *Materials and Methods*). HER2, human epidermal growth factor receptor 2.

[Fig. S1](#)

**Fig. S2.** Boxplots showing CD73 gene expression is highest in TNBC subtype. CD73 expression values were rescaled within each dataset (see *Materials and Methods*). Kruskal–Wallis *P* value is shown ( $n = 6,209$ ).

[Fig. S2](#)

**Fig. S3.** Gene expression profiles of 44 publically available microarray datasets were collected. Patients were assigned to the three main molecular subtypes using the SCM. Correlation (Spearman  $\rho$ ) heatmaps of CD73 expression with ESR1 (single gene and gene module) and PLAU (plasminogen activator urokinase, invasion gene and gene module) are shown according to subtypes. Red indicates positive correlation, with green indicating inverse correlation and black indicating no correlation.

[Fig. S3](#)

**Fig. S4.** (A) Effect of CD73 overexpression in AT-3 mouse breast tumor cells (gray: unstained; dotted: AT3-GFP; full line: AT3-CD73 cells). AT3-GFP and AT3-CD73 cells were treated with increasing doses of DOX for 48 h and cell viability was measured by colorimetric assay. (B) Effect of CD73 gene silencing by shRNA in MDA-MB-231 cells (gray: unstained; white: MDA-MB-231 shGFP; black: MDA-MB-231 shCD73 cells). MDA-MB-231 shGFP and MDA-MB-231 shCD73 cells were treated with increasing doses of DOX for 48 h and cell viability was measured by colorimetric assay. (C) 4T1.2 cells were treated with increasing doses of DOX with or without  $\alpha,\beta$ -methyleneadenosine 5'-diphosphate (APCP; 100  $\mu$ M) for 48 h and cell viability was measured by colorimetric assay. Means  $\pm$  SEs of triplicates are shown. (D) Relative mRNA levels of Cd73, Bcl-2, p-glycoprotein and 18S in MDA-MB-231 shRNA cells compared with MDA-MB-231 shGFP cells (relative to 18S). (E) Subtypes and baseline CD73 expression levels in human breast cancer cells.

[Fig. S4](#)

**Fig. S5.** DOX treatment up-regulates CD73 expression in vivo. NOD-SCID mice were injected subcutaneously with MDA-MB-231 human breast tumor cells ( $10^6$  cells) and treated when tumors reached 50 mm<sup>2</sup> (day 20) with an intratumoral injection of DOX (1 mM in 50  $\mu$ L PBS) or PBS (control, CTR). Tumors were removed 48 h later for CD73 expression analysis. (A) IHC analysis of CD73 expression (in brown) in control-treated and DOX-treated tumors (20 $\times$  magnification). (B) Whole tumor protein extracts were analyzed for CD73 and  $\beta$ -actin expression levels by immunoblotting ( $n = 2$ /group). (C) Same as B, except that a Li-Cor imager was used to measure CD73 expression.

[Fig. S5](#)

**Fig. S6.** Chemotherapy-induced CD73/CD39 up-regulation in breast cancer cells. Human breast cancer cell lines (i.e., MDA-MB-231, MDA-MB-468, SKBR3, BT474, ZR75, and T47D) were treated with increasing doses of DOX, cyclophosphamide (cyclophos), paclitaxel (PAC), 5-fluorouracil (5-FU), cisplatin, or oxaliplatin. CD73 and CD39 expression levels were measured by flow cytometry 48 h after treatment and reported as fold increase relative to untreated cells (means  $\pm$  SEs of triplicates are shown).

[Fig. S6](#)

**Fig. S7.** Chemotherapy-induced CD73/CD39 up-regulation in melanoma and leukemia cells. Human melanoma (LOX-1MV1 and A2058) and leukemia (Kasumi-1 and RPMI-8226) cells were treated with increasing doses of DOX, cyclophosphamide (cyclophos), and 5-FU. CD73 and CD39 expression levels were measured by flow cytometry 48 h after treatment and reported as fold increase relative to untreated cells.

[Fig. S7](#)

**Fig. S8.** (A) Linear regression analysis of CD73 and CD39 up-regulation in response to chemotherapy (using data from Figs. S6 and S7 for DOX). (B) Linear regression analysis of CD73 (Left) and CD39 (Right) maximum up-regulation in human breast cancer cells (from Fig. S6) in response to DOX in relation to baseline CD73 and CD39 expression levels, respectively.

[Fig. S8](#)
