# Supplementary material
Source: PubMed Central journal article supplement (PMC3704029)

# Supplementary Figure S1

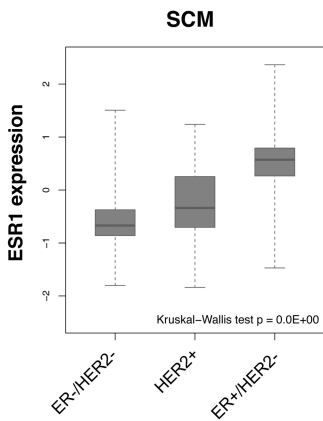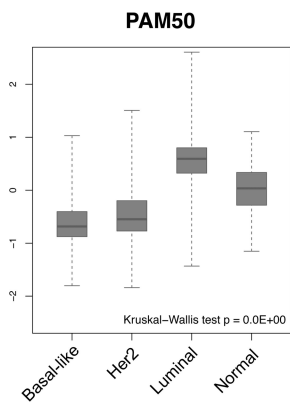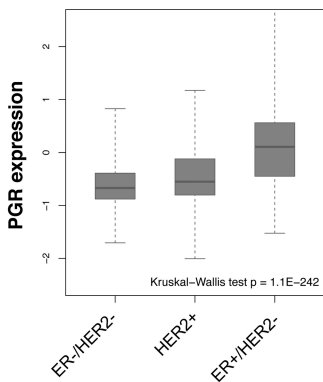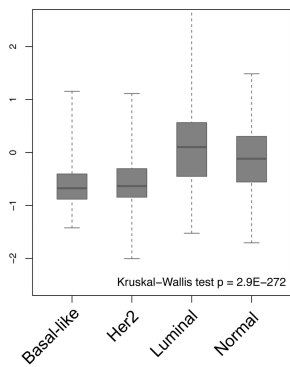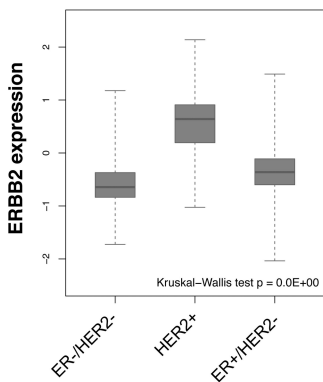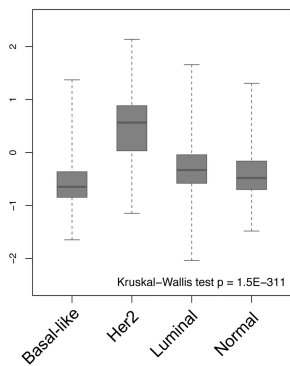

Supplement: 1222251110_sfig01.pdf [file 1222251110_sfig01.pdf]

## Supplementary Figure S2

### All datasets

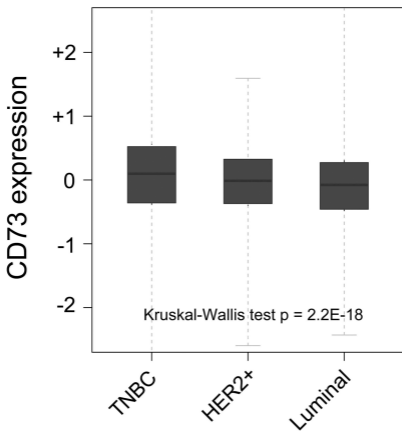

Supplement: 1222251110_sfig02.pdf [file 1222251110_sfig02.pdf]

### Supplementary Figure S3

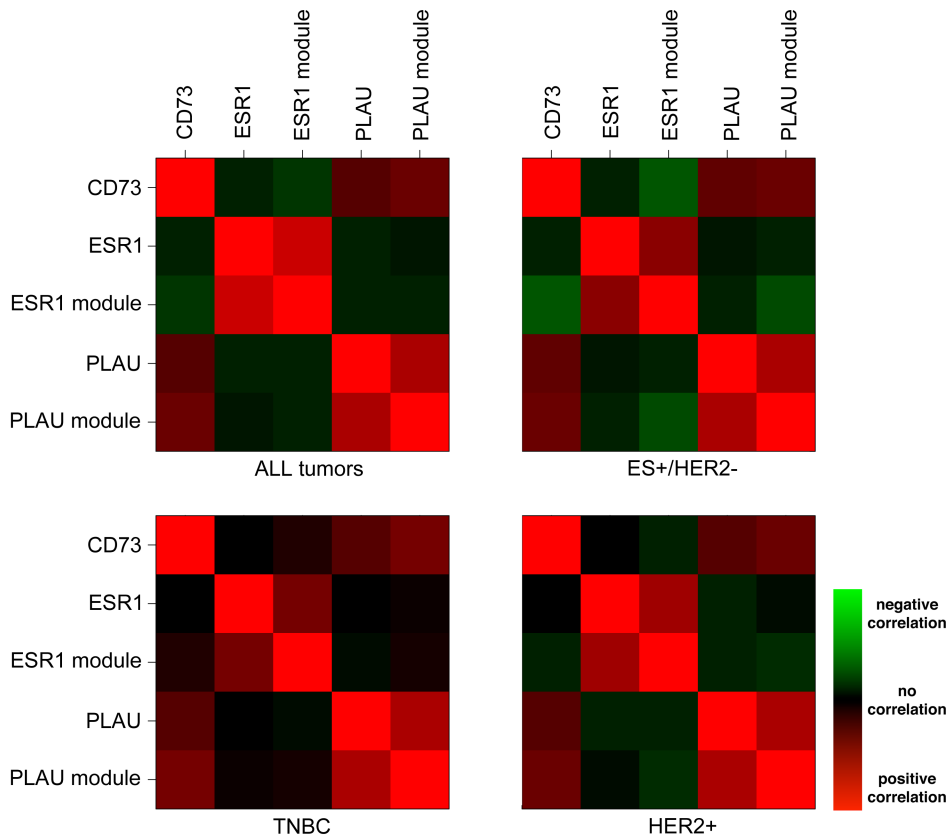

Supplement: 1222251110_sfig03.pdf [file 1222251110_sfig03.pdf]

# Supplementary Figure S4

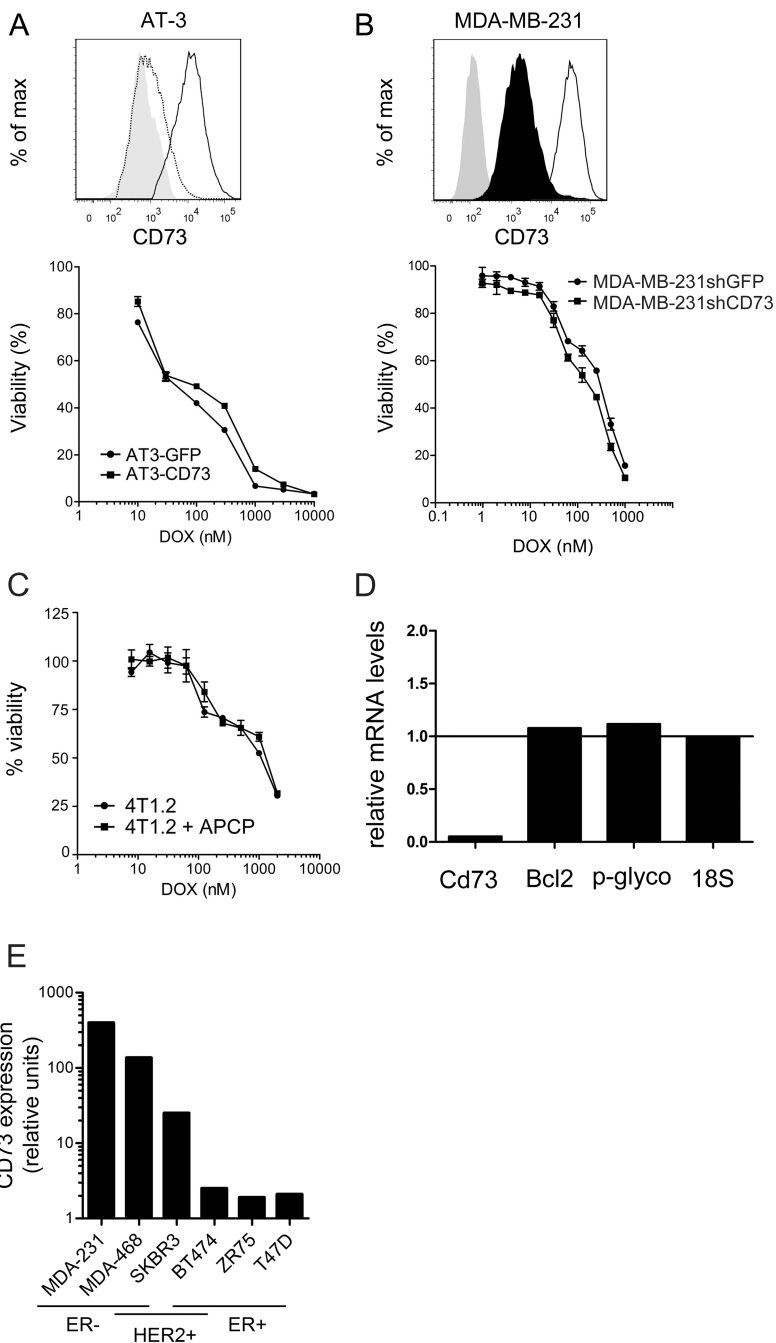

Supplement: 1222251110_sfig04.pdf [file 1222251110_sfig04.pdf]

Supplementary Figure S5

A

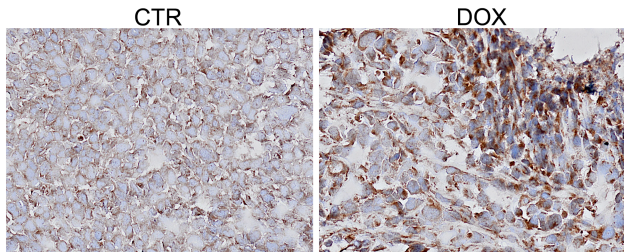

B

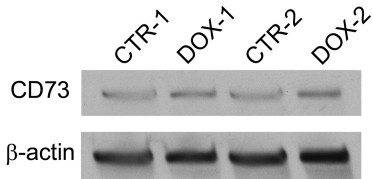

C

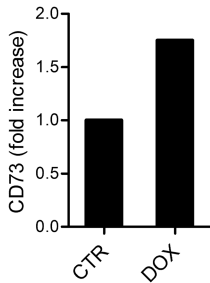

Supplement: 1222251110_sfig05.pdf [file 1222251110_sfig05.pdf]

# Supplementary Figure S6

## MDA231 cells

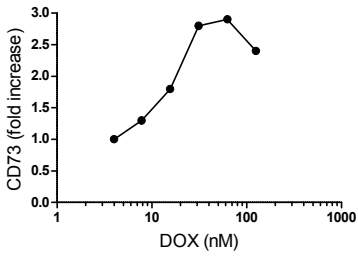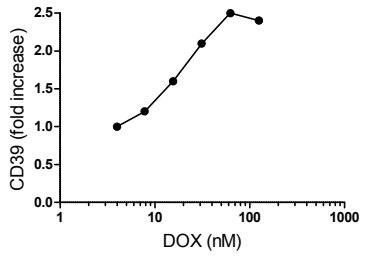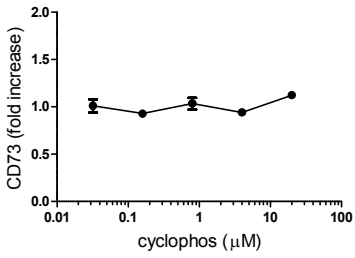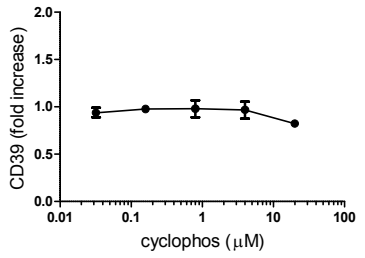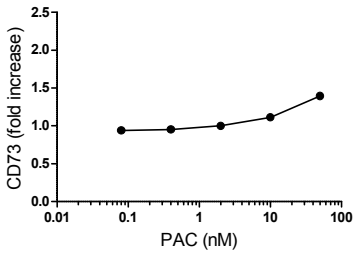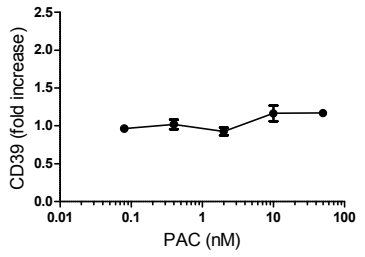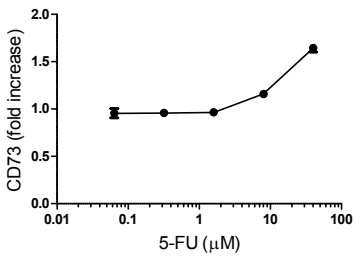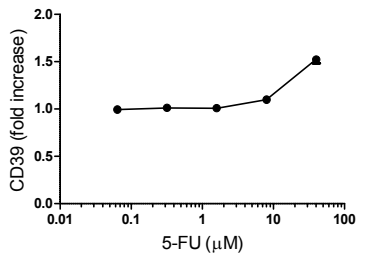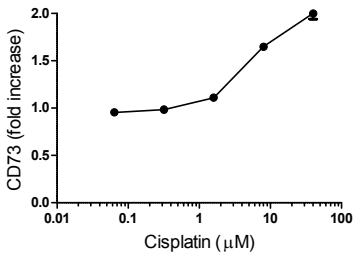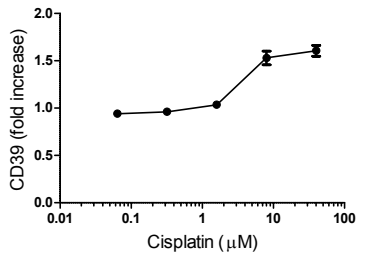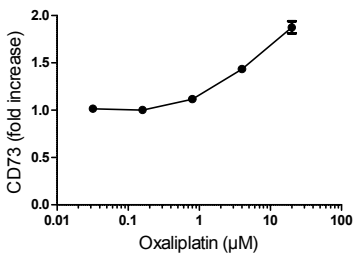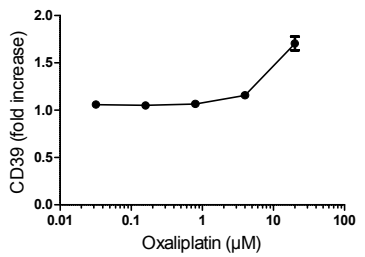

# MDA468 cells

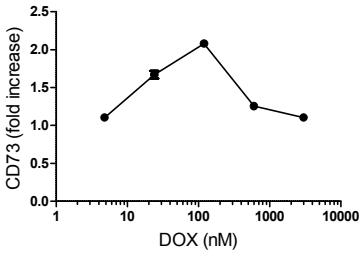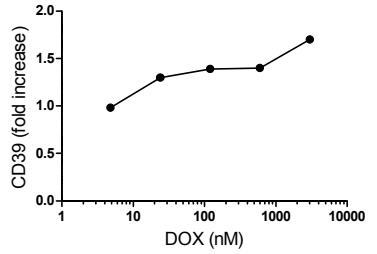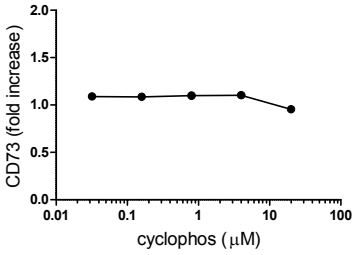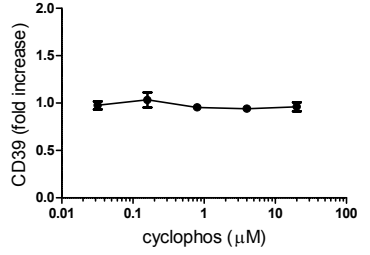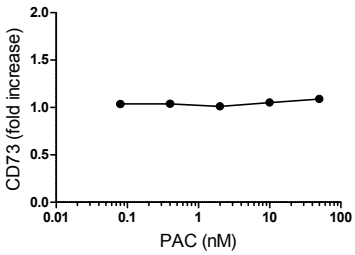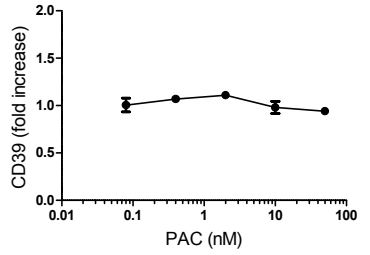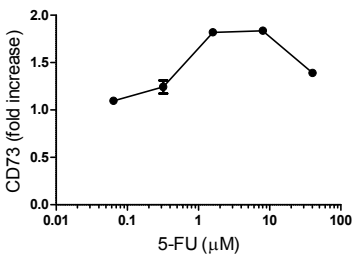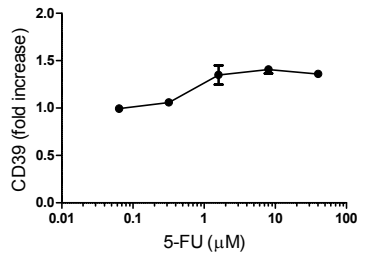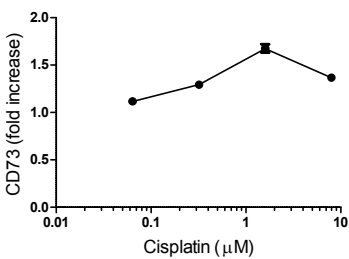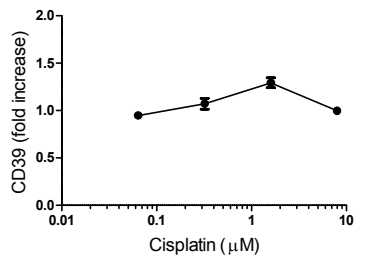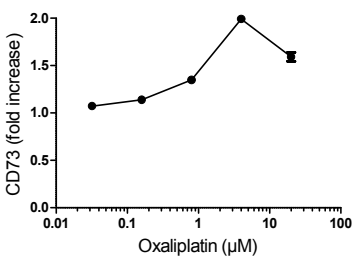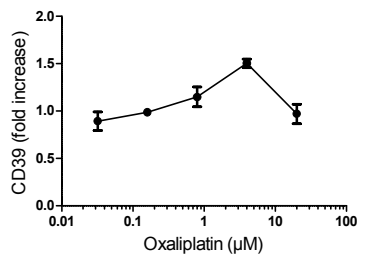

# SKBR3 cells

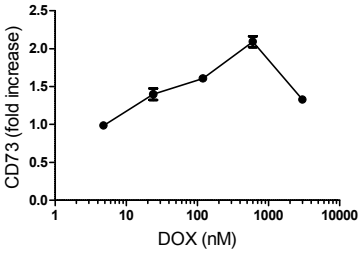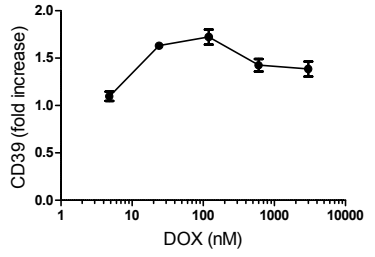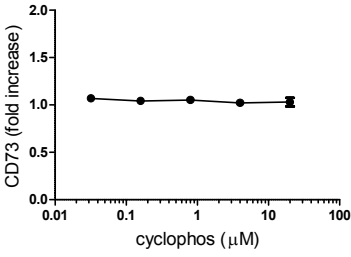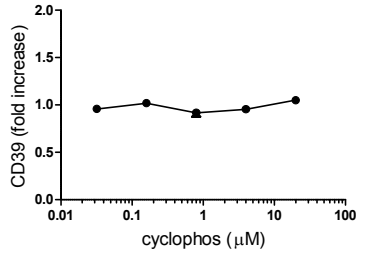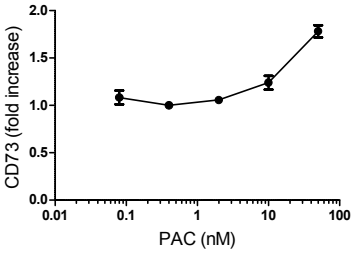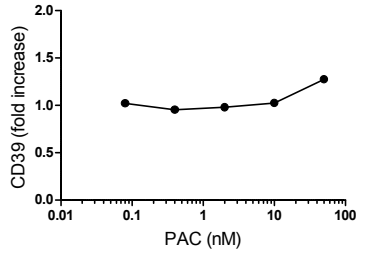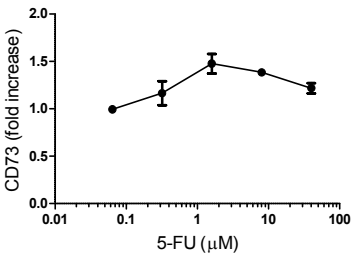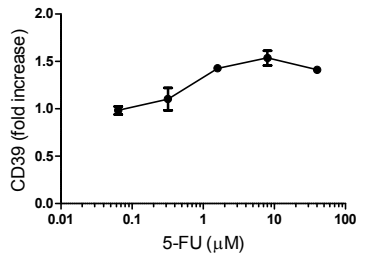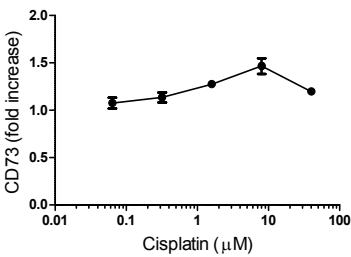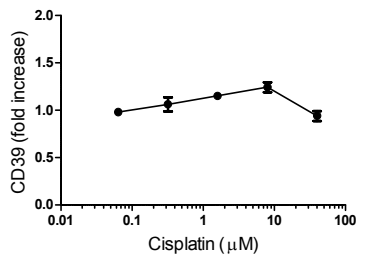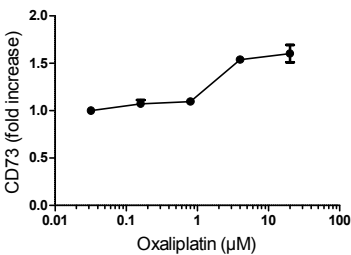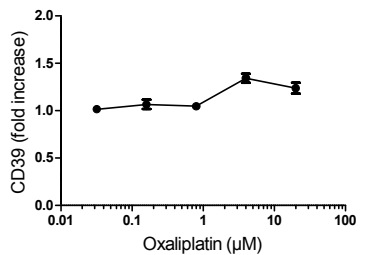

# BT474 cells

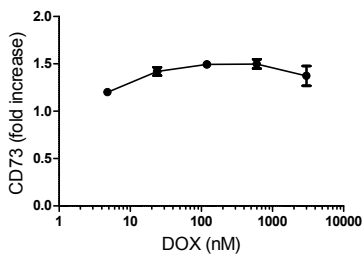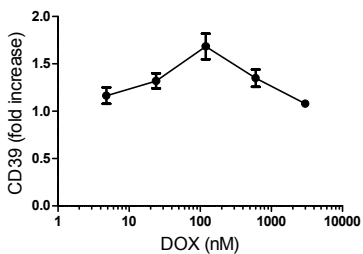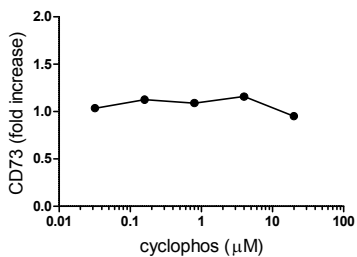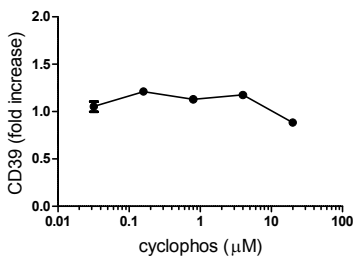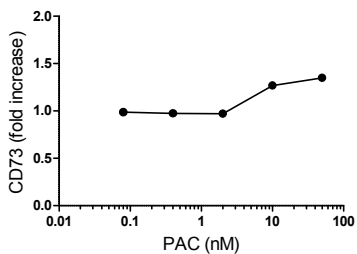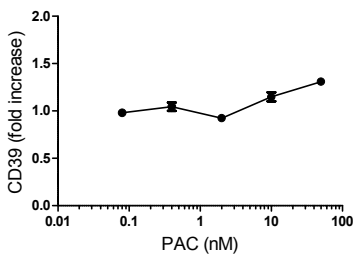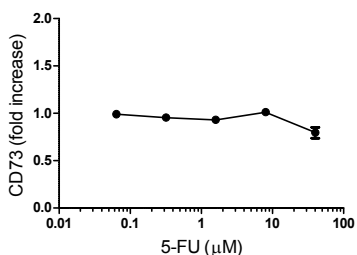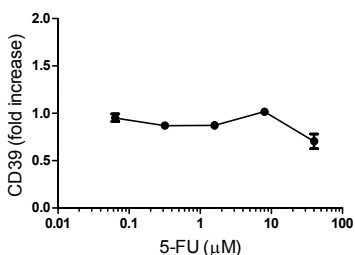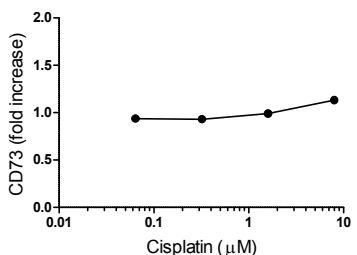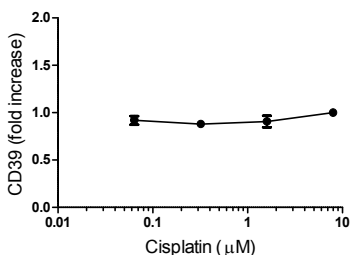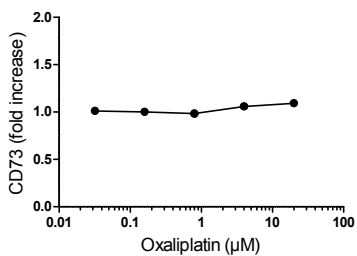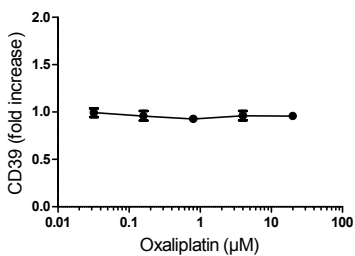

# ZR75 cells

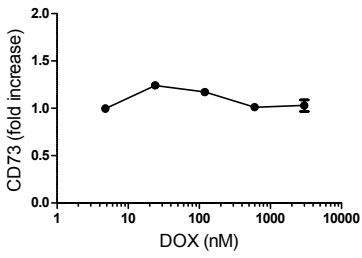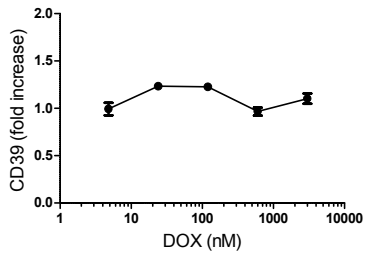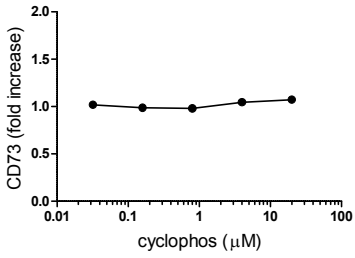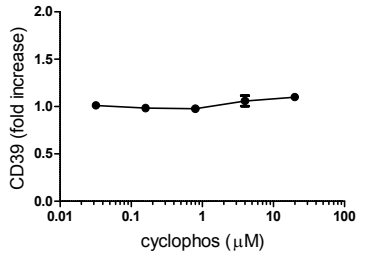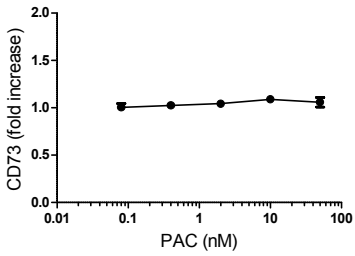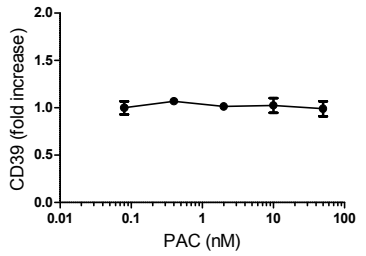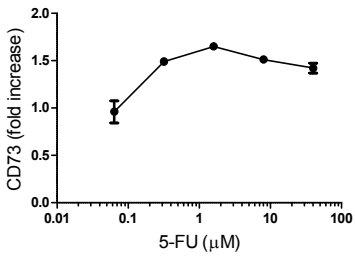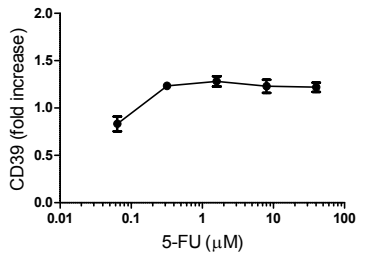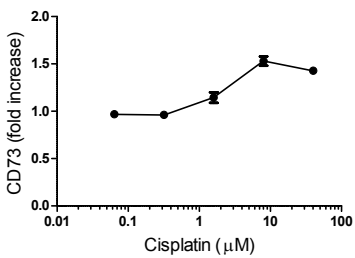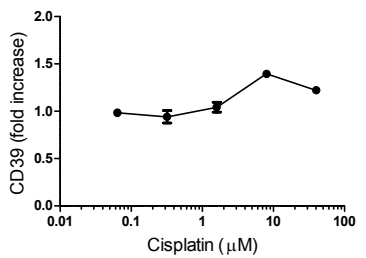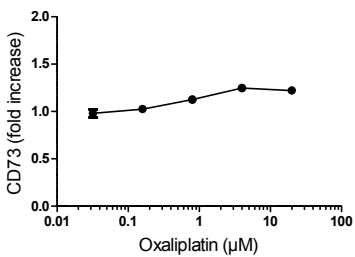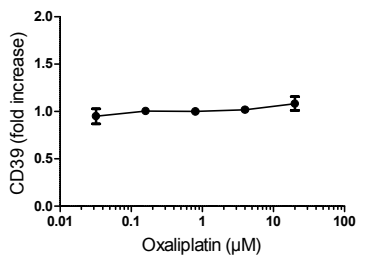

# T47D cells

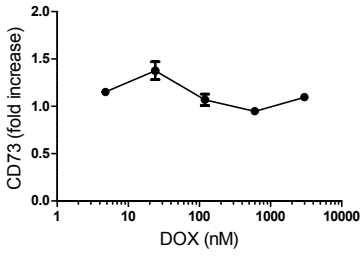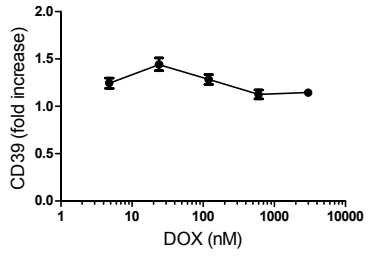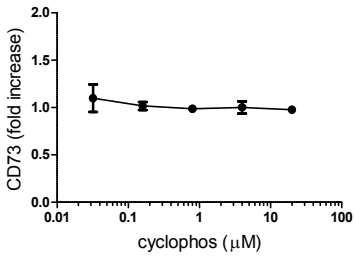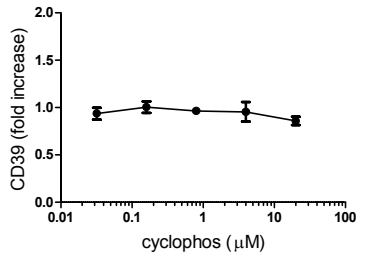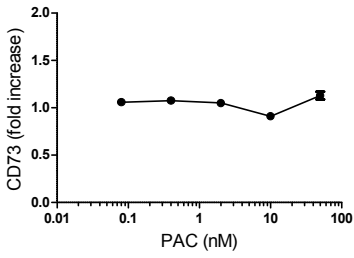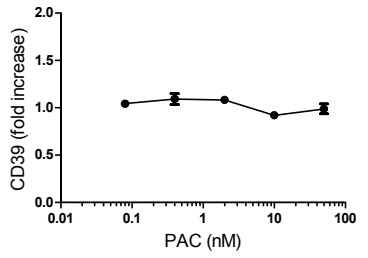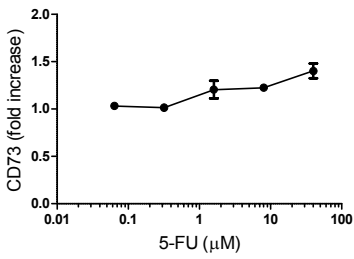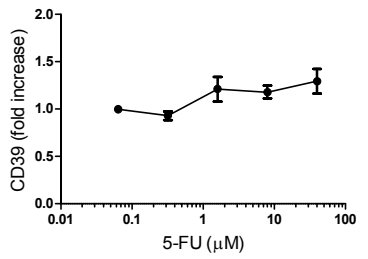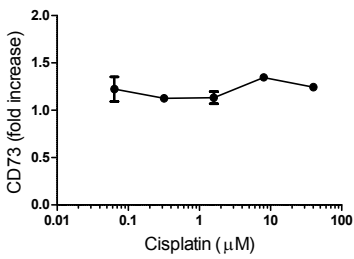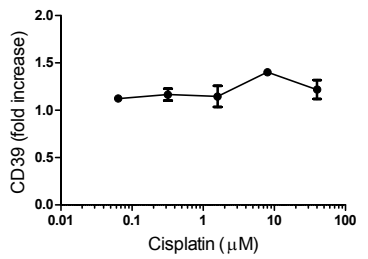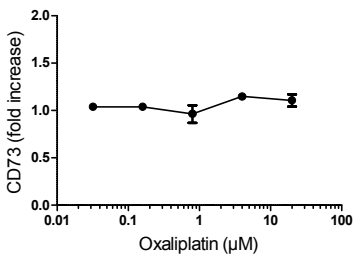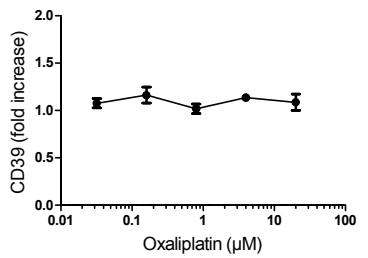

Supplement: 1222251110_sfig06.pdf [file 1222251110_sfig06.pdf]

## LOX-1MV1 cells

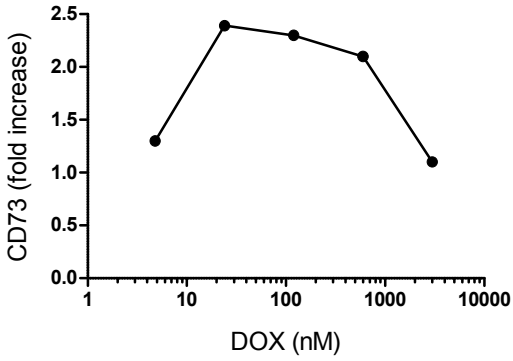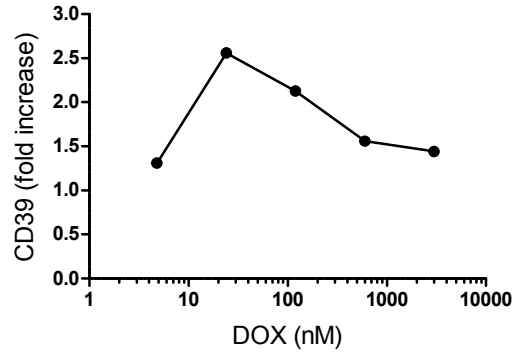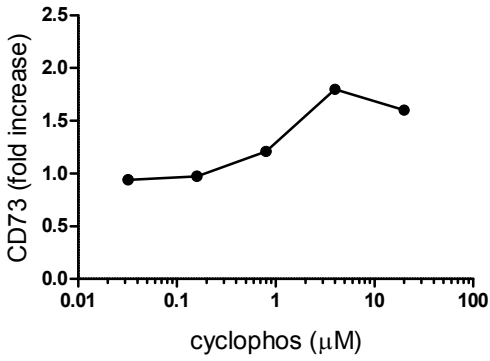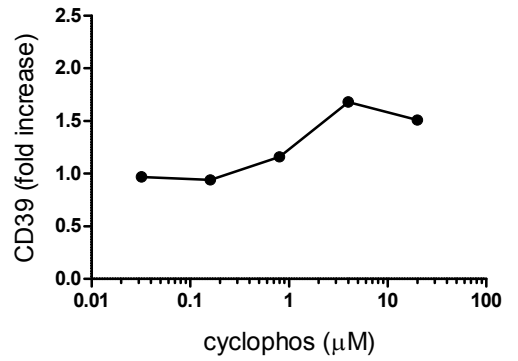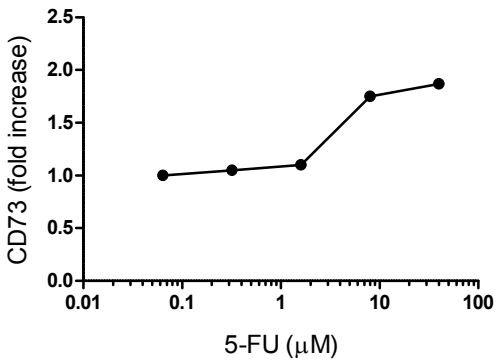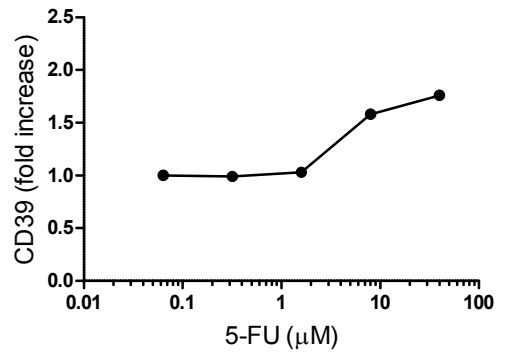

# A2058 cells

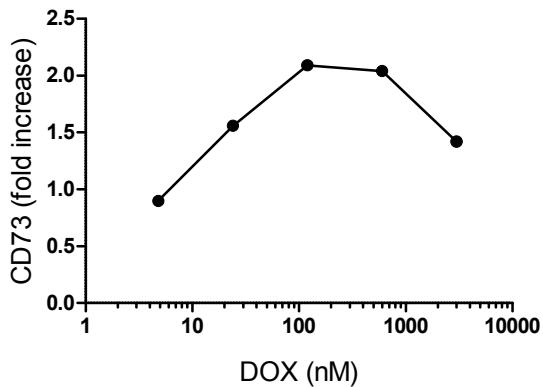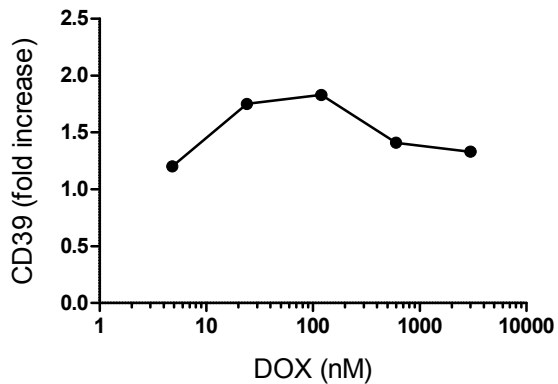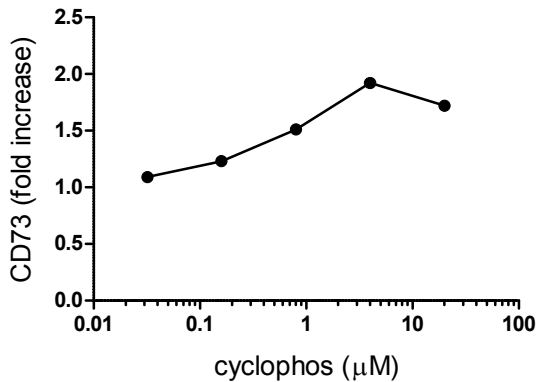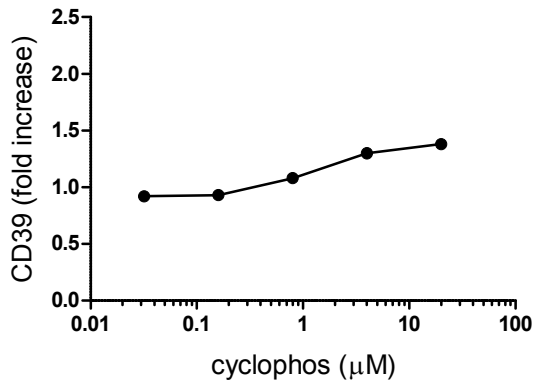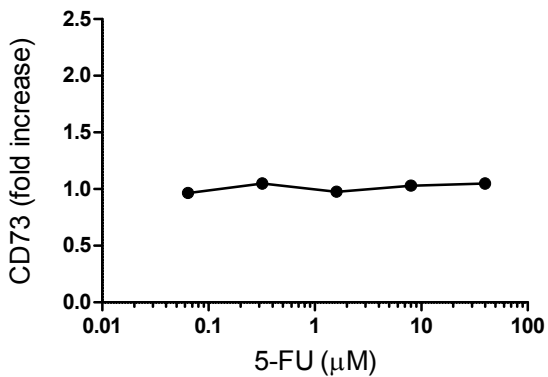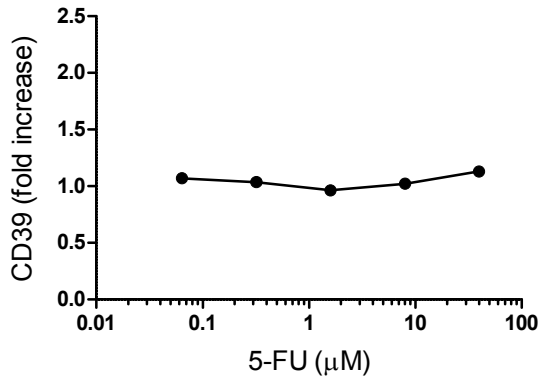

# Kasumi-1 cells

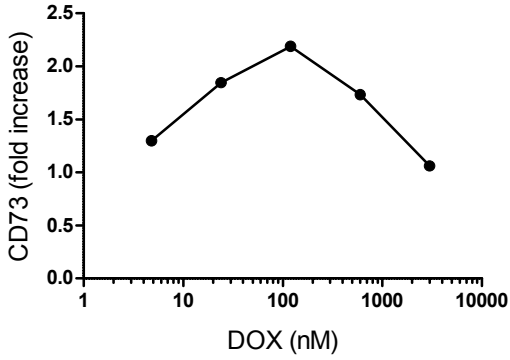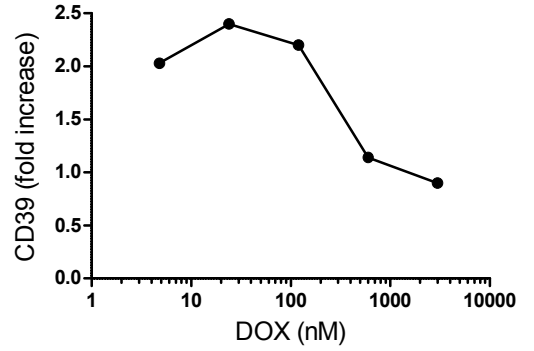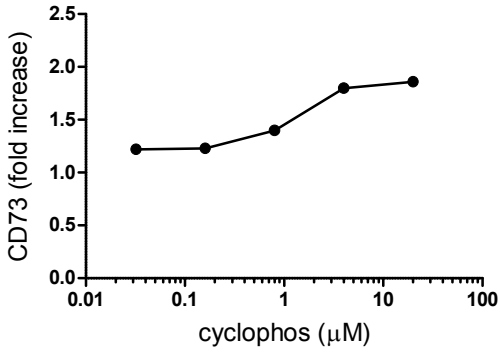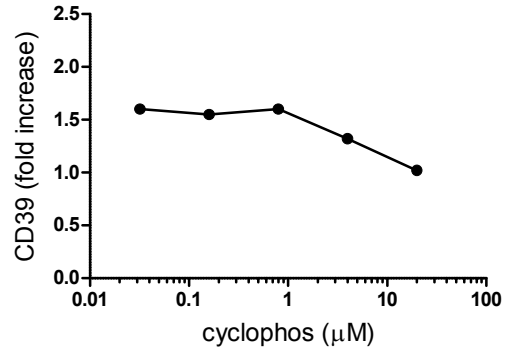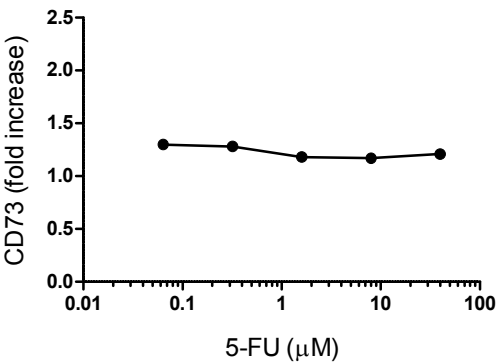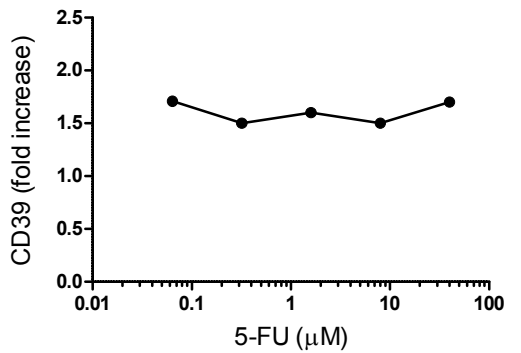

# RPMI-8226 cells

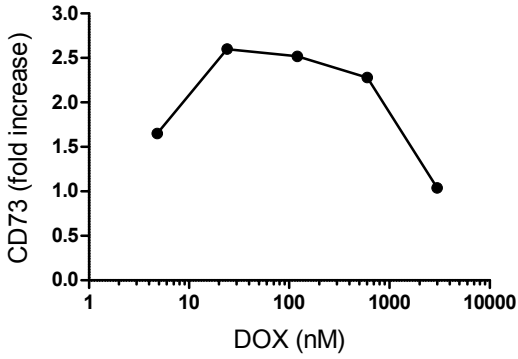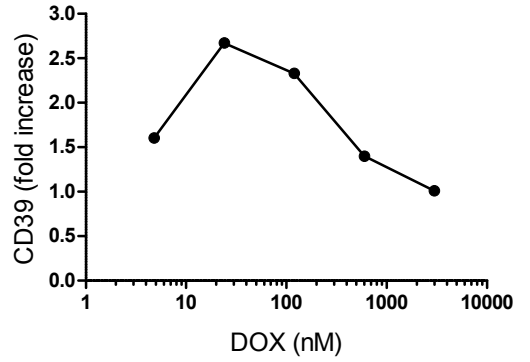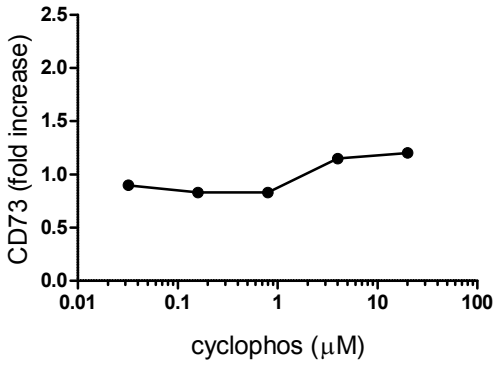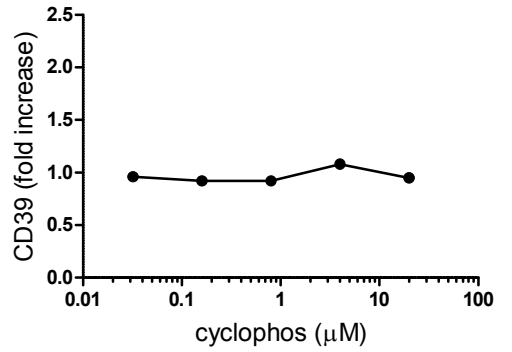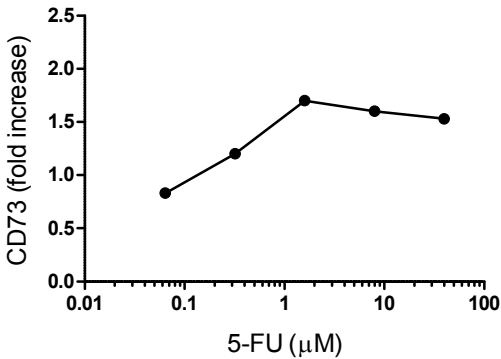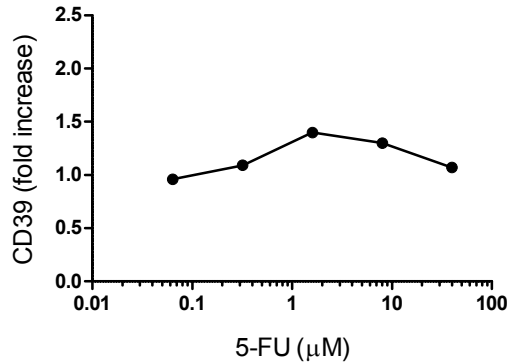

Supplement: 1222251110_sfig07.pdf [file 1222251110_sfig07.pdf]

# Supplementary Figure S8

A

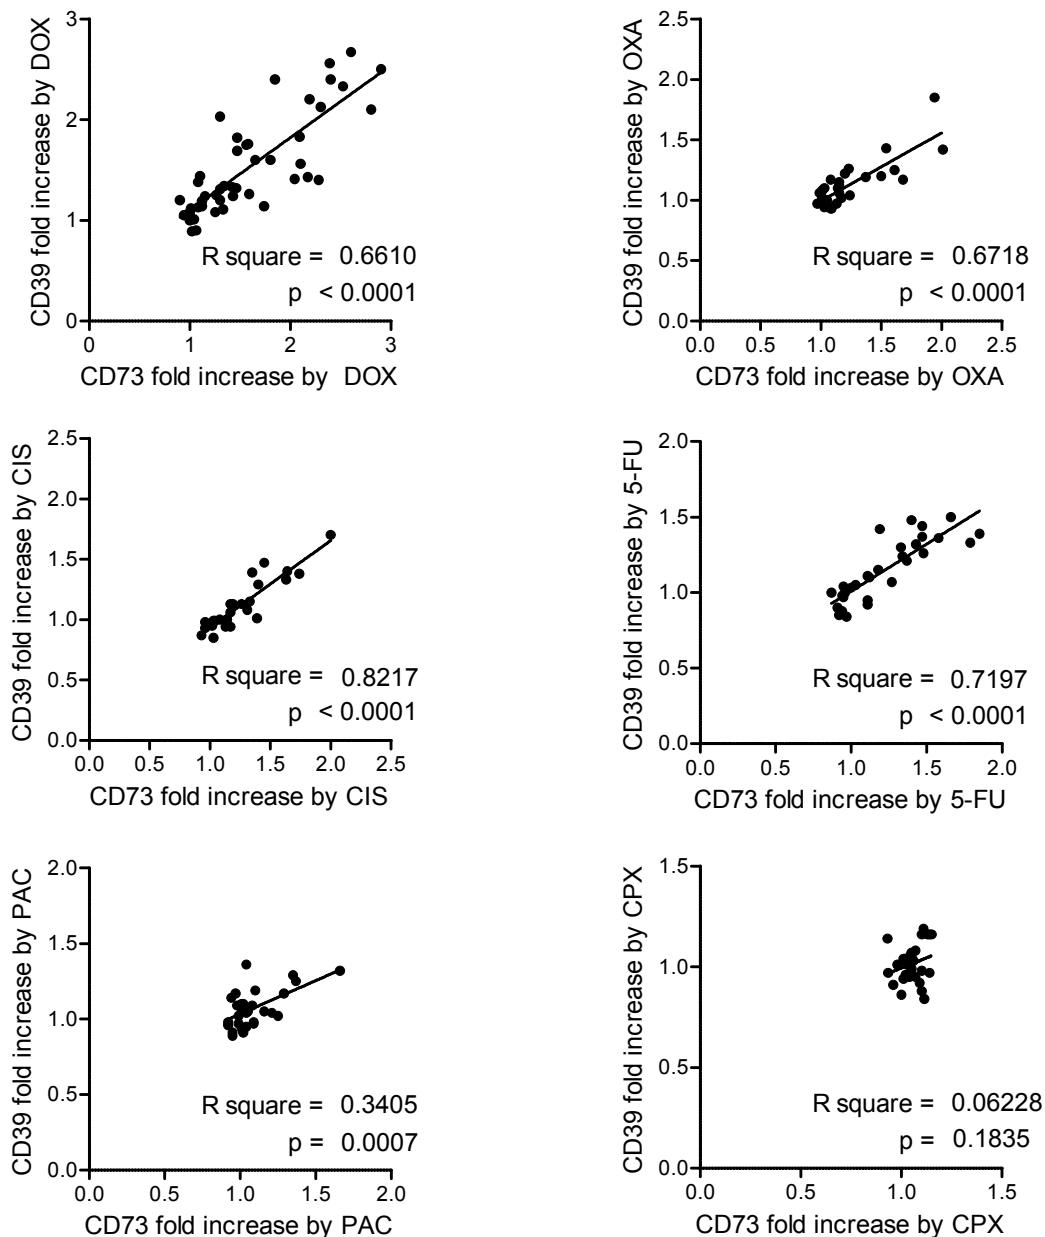

B

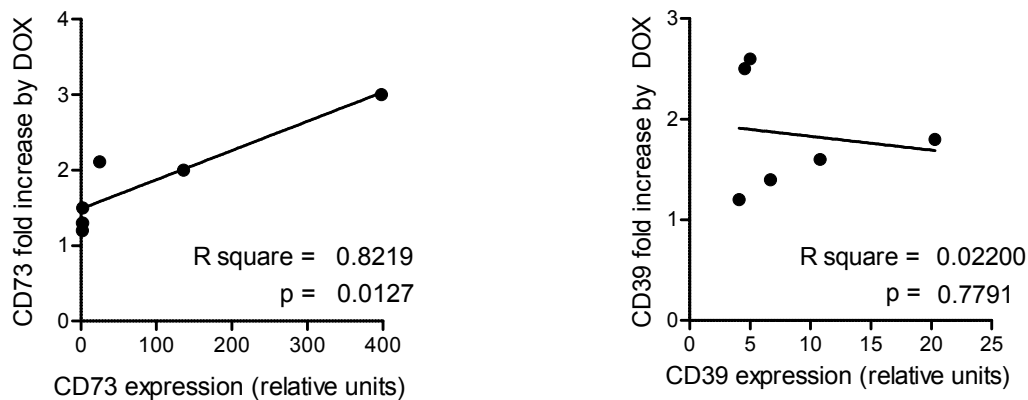

Supplement: 1222251110_sfig08.pdf [file 1222251110_sfig08.pdf]
